# Supplementary material for: Pharmacokinetics of Azalomycin F, a Natural Macrolide Produced by Streptomycete Strains, in Rats
Source: MDPI journal article supplement (doi:10.3390/molecules26216464), 2021-10-26
Supplement: s1 [file s1]

## Supplementary Files

# Pharmacokinetics of Azalomycin F, a Natural Macrolide Produced by Streptomyces Strains, in Rats

Su He <sup>1</sup>, Wenjia Zhao <sup>1</sup>, Peibo Li <sup>2</sup>, Wenqing Tu <sup>3</sup>, Kui Hong <sup>4</sup>, Duoduo Zhang <sup>1</sup>, Tongke Zhang <sup>1</sup>, Ganjun Yuan <sup>1,\*</sup>

- <sup>1</sup> Biotechnological Engineering Center for Pharmaceutical Research and Development, Jiangxi Agricultural University, Nanchang 330045, China; suhepeilin@gmail.com (S.H.); 18770910458@sohu.com (W.Z.); blossom\_zhang@sohu.com (D.Z.); ztk2628925331@sohu.com (T.Z.)
  - <sup>2</sup> Guangdong Engineering and Technology Research Center for Quality and Efficacy Re-evaluation of Post-marketed TCM, State Key Laboratory of Biocontrol and Guangdong Provincial Key Laboratory of Plant Resources, School of Life Sciences, Sun Yat-sen University, Guangzhou 510275, China; li-peibo@mail.sysu.edu.cn
  - <sup>3</sup> Research Institute of Poyang Lake, Jiangxi Academy of Sciences, Nanchang, 330012, China; tuwen-qing@jxas.ac.cn
  - <sup>4</sup> Key Laboratory of Combinatorial Biosynthesis and Drug Discovery, Ministry of Education, School of Pharmaceutical Sciences, Wuhan University, Wuhan 430071, China; kuihong31@whu.edu.cn
- \* Correspondence: gyuan@jxau.edu.cn (G.Y.); Tel.: +86-0791-83813459

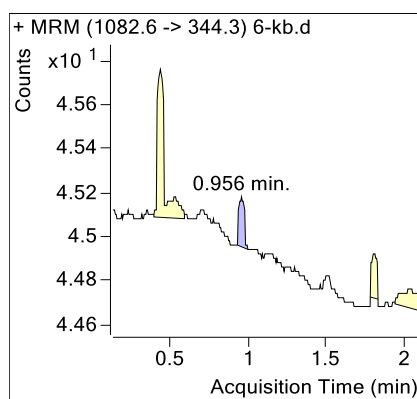

I

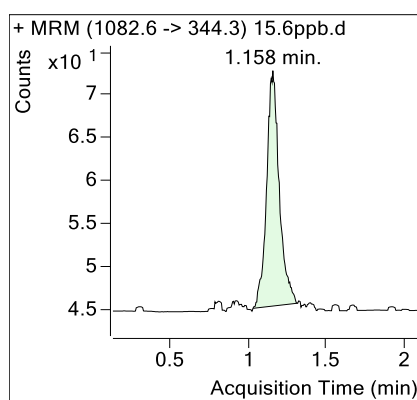

II

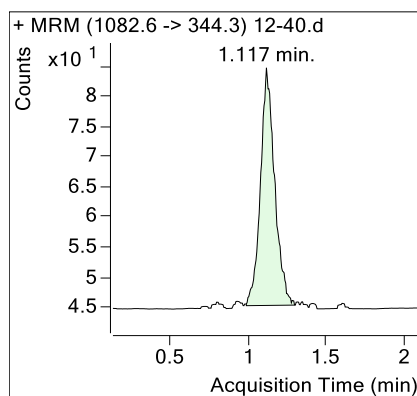

III

**Figures S1.** Representative multiple reaction monitoring (MRM) chromatograms in rat plasma of blank samples (I), blank samples containing LLOQ (15.6 ng/mL) of azalomycin F (II), the obtained samples at 40 min after a single oral administration of azalomycin F (2.0 mg/kg) (III).

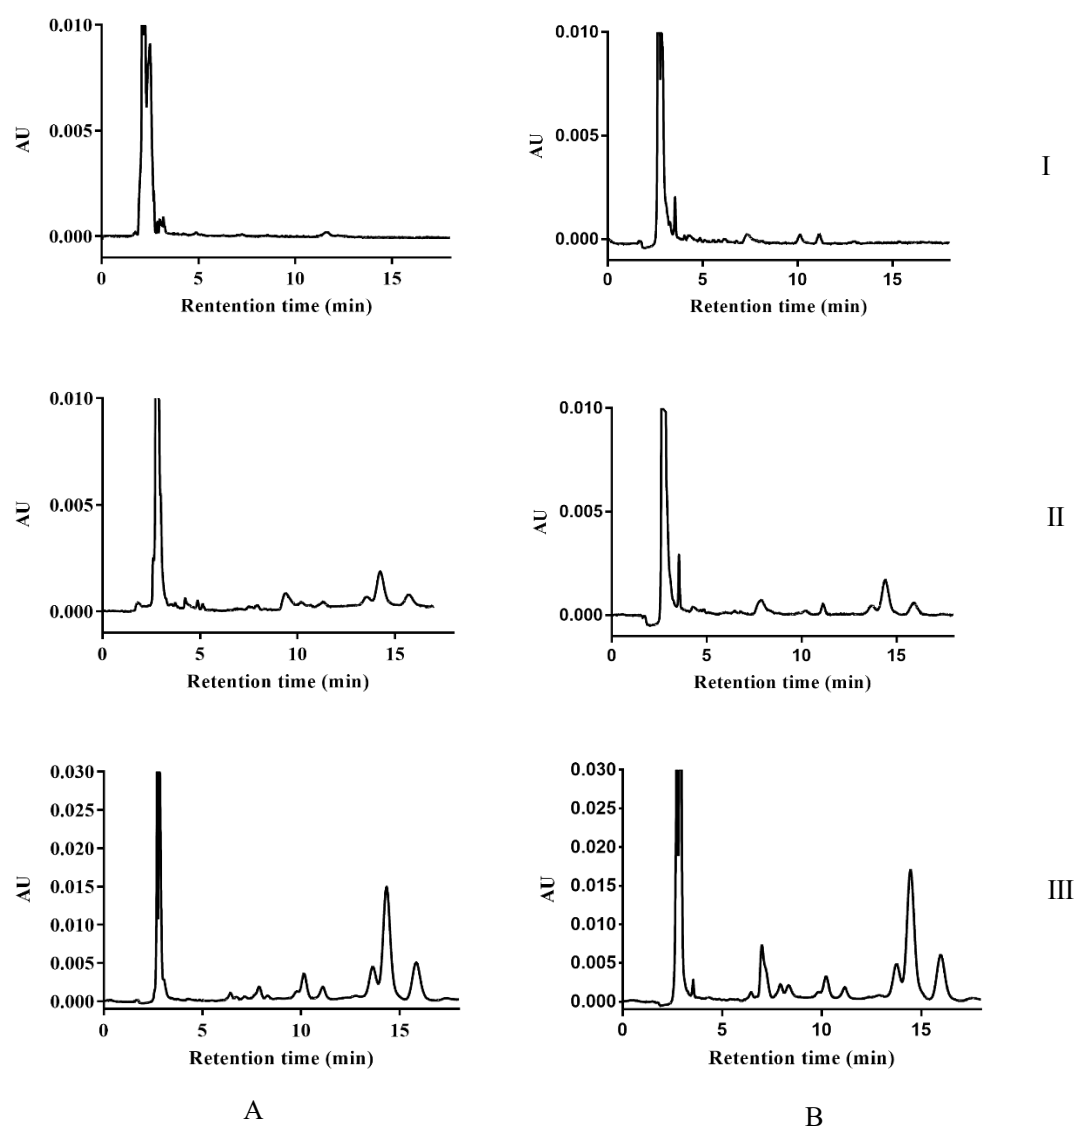

**Figures S2.** Representative HPLC-UV chromatograms in rat plasma (A), whole blood (B) of blank samples (I), blank samples containing LLOQ of azalomycin F (II), the obtained samples in plasma and whole blood stability test (III). (A) plasma (I: blank, II: LLOQ, III: the obtained sample at 5 h after incubated in plasma); (B) whole blood (I: blank, II: LLOQ, III: the obtained sample at 5 h after incubated in whole blood).

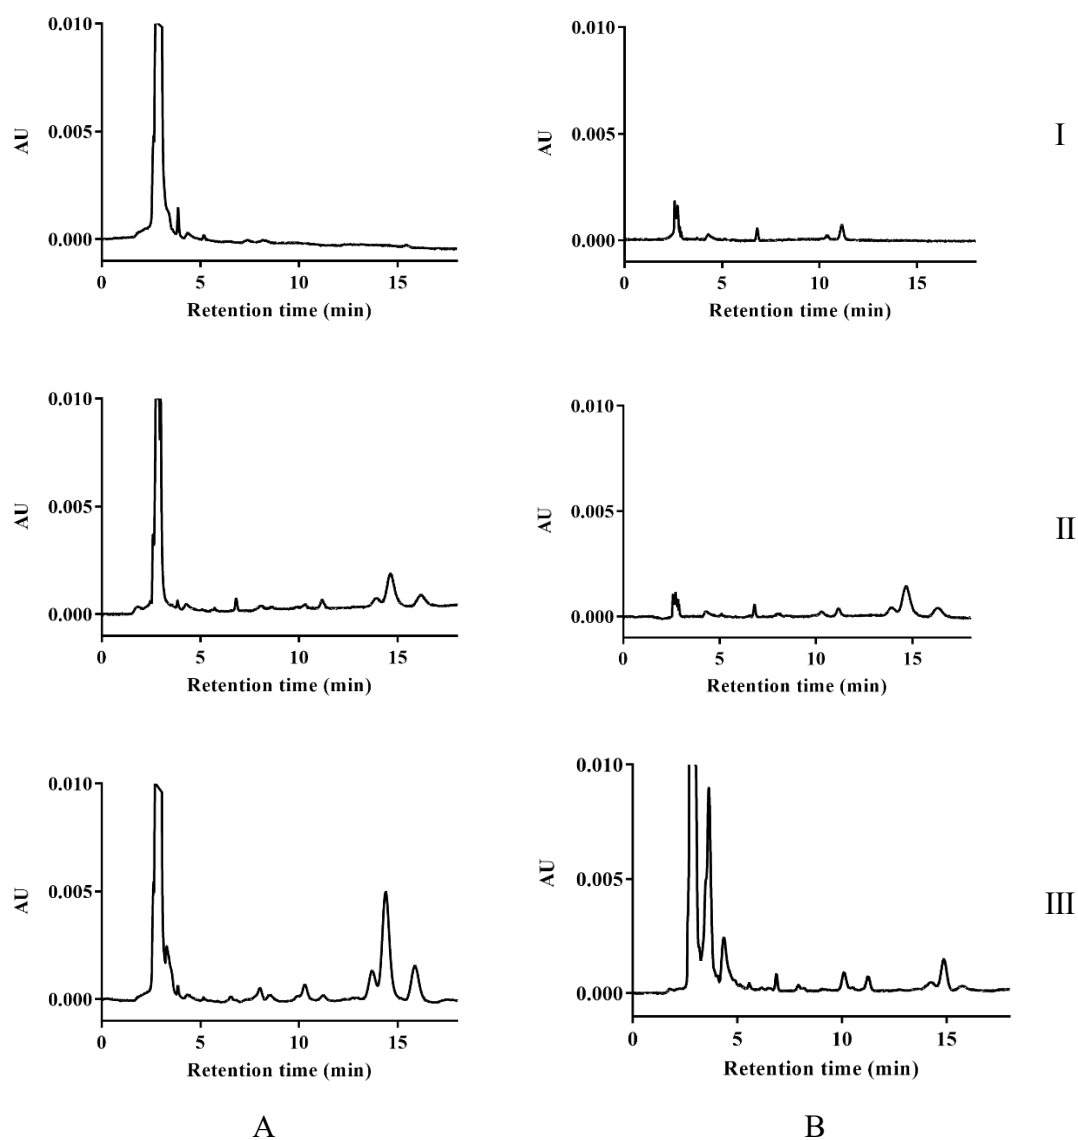

**Figures S3.** Representative HPLC-UV chromatograms in rat liver homogenate (A), intestinal sac fluid samples (B) of blank samples (I), blank samples containing LLOQ of azalomycin F (II), the obtained samples in liver homogenate metabolism experiment and intestinal sac absorption test (III). (A) liver homogenate (I: blank, II: LLOQ, III: the obtained sample at 17 h after incubated in liver homogenate); (B) intestinal sac fluid samples (I: blank, II: LLOQ, III: the obtained sample at 4 h after in vitro intestinal absorption).

**Table S1.** Standard curve, correlation coefficient and the limit of quantification of azalomycin F  
(*n*=3)

| Biological Samples   | Standard curve                | Correlation coefficient ( <i>r</i> ) | The limit of quantifications (LOQs) |
|----------------------|-------------------------------|--------------------------------------|-------------------------------------|
| Plasma               | $y = 1 \cdot 10^7 x + 60260$  | 0.9962                               | 3.12 µg/mL                          |
| Whole blood          | $y = 2 \cdot 10^7 x + 39610$  | 0.9989                               | 3.12 µg/mL                          |
| Liver homogenate     | $y = 1 \cdot 10^7 x + 67037$  | 0.9991                               | 3.12 µg/mL                          |
| Intestinal sac fluid | $y = 1 \cdot 10^7 x + 50772$  | 0.9976                               | 3.12 µg/mL                          |
| Plasma*              | $y = 5.8412 \cdot x + 96.537$ | 0.9994                               | 15.6 ng/mL                          |

\*: The sample of plasma was evaluated by ultra-high performance liquid chromatography tandem mass spectrometry (UPLC–MS/MS) method.

**Table S2.** The precision and accuracy of the intra- and inter-day of the analysis method (*n*=5)

| Biological Samples   | Intra- Day                             |                                         |              |                    | Inter- Day                              |              |                    |
|----------------------|----------------------------------------|-----------------------------------------|--------------|--------------------|-----------------------------------------|--------------|--------------------|
|                      | Nominal Concentration (µg/mL or ng/mL) | Measured concentration (µg/mL or ng/mL) | Accuracy (%) | Precision (RSD, %) | Measured concentration (µg/mL or ng/mL) | Accuracy (%) | Precision (RSD, %) |
| Plasma               | 3.12                                   | 2.88                                    | 92.31        | 9.71               | 2.81                                    | 90.06        | 7.83               |
|                      | 12.5                                   | 12.25                                   | 97.97        | 4.32               | 11.62                                   | 93.00        | 6.97               |
|                      | 100                                    | 101.82                                  | 101.82       | 1.88               | 94.88                                   | 94.88        | 5.74               |
| Blood                | 3.12                                   | 3.27                                    | 104.90       | 9.44               | 3.26                                    | 104.56       | 9.77               |
|                      | 12.5                                   | 12.77                                   | 102.13       | 4.18               | 13.09                                   | 104.70       | 4.61               |
|                      | 100                                    | 94.54                                   | 94.54        | 7.02               | 99.09                                   | 99.09        | 6.40               |
| Liver homogenate     | 3.12                                   | 3.11                                    | 99.56        | 5.03               | 3.11                                    | 99.74        | 5.15               |
|                      | 12.5                                   | 12.80                                   | 102.38       | 3.37               | 12.55                                   | 100.40       | 3.05               |
|                      | 100                                    | 106.83                                  | 106.83       | 2.15               | 103.20                                  | 103.20       | 4.73               |
| Intestinal sac fluid | 3.12                                   | 3.04                                    | 97.58        | 2.49               | 2.97                                    | 95.12        | 3.38               |
|                      | 12.5                                   | 12.64                                   | 101.12       | 6.82               | 12.62                                   | 100.94       | 3.92               |
|                      | 100                                    | 95.98                                   | 95.98        | 2.41               | 95.72                                   | 95.72        | 2.32               |
| Plasma*              | 15.6                                   | 12.78                                   | 81.93        | 4.34               | 13.16                                   | 84.25        | 8.32               |
|                      | 125                                    | 107.05                                  | 85.64        | 5.14               | 107.17                                  | 85.73        | 10.13              |
|                      | 500                                    | 504.06                                  | 100.81       | 6.67               | 504.03                                  | 100.81       | 11.23              |

\*: The sample of plasma was evaluated by ultra-high performance liquid chromatography tandem mass spectrometry (UPLC–MS/MS) method.

**Table S3.** The extraction recovery and matrix effect of the analysis methods (*n*=5)

| Biological Samples   | Nominal Concentration (µg/mL or ng/mL) | Matrix Effect (%) | Extraction Recovery (%) |
|----------------------|----------------------------------------|-------------------|-------------------------|
| Plasma               | 3.12                                   | 107.58            | 97.08                   |
|                      | 12.5                                   | 101.29            | 105.86                  |
|                      | 100                                    | 103.81            | 106.57                  |
| Blood                | 3.12                                   | 108.54            | 96.64                   |
|                      | 12.5                                   | 105.27            | 97.02                   |
|                      | 100                                    | 108.00            | 87.54                   |
| Liver homogenate     | 3.12                                   | 100.27            | 100.72                  |
|                      | 12.5                                   | 101.56            | 100.01                  |
|                      | 100                                    | 98.92             | 98.11                   |
| Intestinal sac fluid | 3.12                                   | 95.78             | 101.88                  |
|                      | 12.5                                   | 93.38             | 108.29                  |
|                      | 100                                    | 89.46             | 107.28                  |
| Plasma*              | 15.6                                   | 46.30             | 104.74                  |
|                      | 125                                    | 47.54             | 95.46                   |
|                      | 500                                    | 50.62             | 89.02                   |

\*: The sample of plasma was evaluated by ultra-high performance liquid chromatography tandem mass spectrometry (UPLC–MS/MS) method.

**Table S4.** Stability of azalomycin F under various storage conditions (HPLC–UV method, *n*=5)

| Biological Samples   | Concentration (µg/mL) | room temperature for 24 h |         | Post- preparative stability (at 4°C for 48 h) |         | Freeze- thawing three cycles (at –20°C) |         | Freezing storage (at - 20°C for 3.5 months) |         |
|----------------------|-----------------------|---------------------------|---------|-----------------------------------------------|---------|-----------------------------------------|---------|---------------------------------------------|---------|
|                      |                       | Accuracy (%)              | RSD (%) | Accuracy (%)                                  | RSD (%) | Accuracy (%)                            | RSD (%) | Accuracy (%)                                | RSD (%) |
| Plasma               | 3.12                  | 101.03                    | 8.53    | 99.01                                         | 8.28    | 95.99                                   | 5.14    | 104.11                                      | 13.91   |
|                      | 12.5                  | 105.80                    | 4.07    | 97.69                                         | 8.69    | 97.80                                   | 4.22    | 108.38                                      | 7.32    |
|                      | 100                   | 100.84                    | 2.63    | 91.33                                         | 2.90    | 89.73                                   | 1.51    | 103.68                                      | 2.22    |
| Blood                | 3.12                  | 94.78                     | 9.69    | 100.23                                        | 9.78    | 83.58                                   | 7.04    | 105.36                                      | 3.47    |
|                      | 12.5                  | 92.45                     | 4.52    | 106.71                                        | 5.11    | 87.56                                   | 3.35    | 90.46                                       | 3.89    |
|                      | 100                   | 95.67                     | 6.29    | 94.73                                         | 7.26    | 87.64                                   | 0.69    | 100.75                                      | 1.87    |
| Liver homogenate     | 3.12                  | 101.00                    | 3.56    | 98.99                                         | 5.03    | 98.51                                   | 7.34    | 90.12                                       | 3.16    |
|                      | 12.5                  | 101.57                    | 3.31    | 100.98                                        | 3.37    | 98.66                                   | 2.59    | 95.08                                       | 2.52    |
|                      | 100                   | 97.04                     | 2.32    | 100.40                                        | 2.15    | 99.86                                   | 2.51    | 100.89                                      | 1.60    |
| Intestinal sac fluid | 3.12                  | 95.37                     | 3.75    | 94.29                                         | 2.92    | 98.17                                   | 1.76    | 91.57                                       | 6.07    |
|                      | 12.5                  | 93.46                     | 6.94    | 100.39                                        | 0.88    | 99.06                                   | 2.26    | 91.81                                       | 2.33    |
|                      | 100                   | 96.12                     | 3.47    | 99.77                                         | 2.42    | 99.41                                   | 2.65    | 94.41                                       | 5.10    |

**Table S5.** Mean feces accumulative excretion amount of azalomycin F after single **oral administration** (26.4 mg/kg) evaluated by the HPLC-UV method in rats ( $n=3$ , mean  $\pm$  SD) <sup>a</sup>

| Time Point (h)         | 6-12              | 12-24             | 24-48             | Accumulative Excretion |
|------------------------|-------------------|-------------------|-------------------|------------------------|
| Excretion Amount (mg)  | 0.516 $\pm$ 0.430 | 0.363 $\pm$ 0.174 | 0.324 $\pm$ 0.223 | 1.381 $\pm$ 0.830      |
| Percentage of dose (%) | 7.82 $\pm$ 6.52   | 5.5 $\pm$ 2.64    | 4.91 $\pm$ 3.38   | 20.92 $\pm$ 12.58      |

<sup>a</sup>: Feces at each time period was collected to a volumetric flask of 100 mL, and about 90 to 95 mL methanol was added to. Then, the mixture was sonicated for 15 min, and a small amount of methanol was added to tick mark. Finally, the mixture was mixed well, and the supernatant was filtered through a filter membrane (0.22  $\mu$ m) to obtain the test sample for HPLC-UV analyses according to the method as "2.4. HPLC Analysis and Method Validation.

**Table S6.** Mean feces accumulative excretion amount of azalomycin F after single **intravenous administration** (2.0 mg/kg) evaluated by the HPLC-UV method in rats ( $n=3$ , mean  $\pm$  SD) <sup>a</sup>

| Time Point (h)         | 6-12              | 12-24             | 24-48             | Accumulative Excretion |
|------------------------|-------------------|-------------------|-------------------|------------------------|
| Excretion Amount (mg)  | 0.082 $\pm$ 0.023 | 0.054 $\pm$ 0.024 | 0.035 $\pm$ 0.030 | 0.171 $\pm$ 0.077      |
| Percentage of dose (%) | 16.40 $\pm$ 4.60  | 10.80 $\pm$ 4.80  | 7.00 $\pm$ 6.00   | 34.20 $\pm$ 15.40      |

<sup>a</sup>: Feces at each time period was collected to a volumetric flask of 100 mL, and about 90 to 95 mL methanol was added to. Then, the mixture was sonicated for 15 min, and a small amount of methanol was added to tick mark. Finally, the mixture was mixed well, and the supernatant was filtered through a filter membrane (0.22  $\mu$ m) to obtain the test sample for HPLC-UV analyses according to the method as "2.4. HPLC Analysis and Method Validation.
